# Supplementary material for: Antisense oligonucleotides extend survival of prion-infected mice
Source: JCI journal article supplement (doi:10.1172/jci.insight.131175), 2019-07-30
Supplement: sd1 [file 1]

## SUPPLEMENTAL DATA

### Antisense oligonucleotides extend survival of prion-infected mice

Gregory J Raymond<sup>1</sup>, Hien Tran Zhao<sup>2</sup>, Brent Race<sup>1</sup>, Lynne D Raymond<sup>1</sup>, Katie Williams<sup>1</sup>, Eric Swayze<sup>2</sup>, Samantha Graffam<sup>3</sup>, Jason Le<sup>3</sup>, Tyler Caron<sup>3</sup>, Jacquelyn Stathopoulos<sup>3</sup>, Rhonda O'Keefe<sup>3</sup>, Lori L Lubke<sup>1</sup>, Andrew G. Reidenbach<sup>3</sup>, Allison Kraus<sup>1</sup>, Stuart L Schreiber<sup>3</sup>, Curt Mazur<sup>2</sup>, Deborah E Cabin<sup>4</sup>, Jeffrey B Carroll<sup>5</sup>, Eric Vallabh Minikel<sup>1,3,6,7</sup>, Holly Kordasiewicz<sup>2</sup>, Byron Caughey<sup>1,†</sup>, Sonia M Vallabh<sup>1,3,6,7,†</sup>

### Supplementary Figures

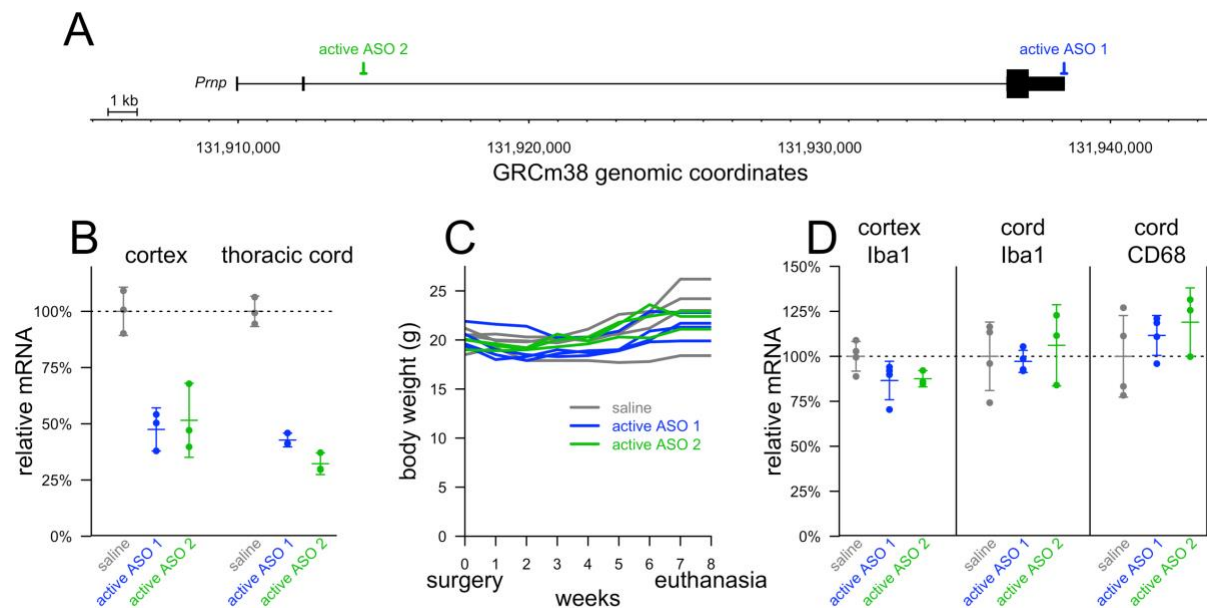

**Figure S1. Screening of PrP-lowering ASOs.** **A)** Genomic location of sequences targeted by active ASOs 1 and 2. GRCm38 reference sequence, chromosome 2. Gene structure represented by line (introns), medium bar (5' and 3'UTR), and thick bar (open reading frame). **B)** C57BL/6N animals (N=3 per group) were given a single 300µg ICV bolus dose of the indicated ASOs and ipsilateral PrP mRNA was quantified by qPCR 2 weeks later. **C-D)** C57BL/6N animals (N=4 per group, of which one active ASO 2 animal died of surgical complications) were given a single 700 µg ICV bolus dose. Body weights (C) were monitored for 8 weeks, and then animals were sacrificed for qPCR analysis (D) of inflammatory markers. In B and D, dots represent individual animals, and bars represent mean and 95% confidence intervals.

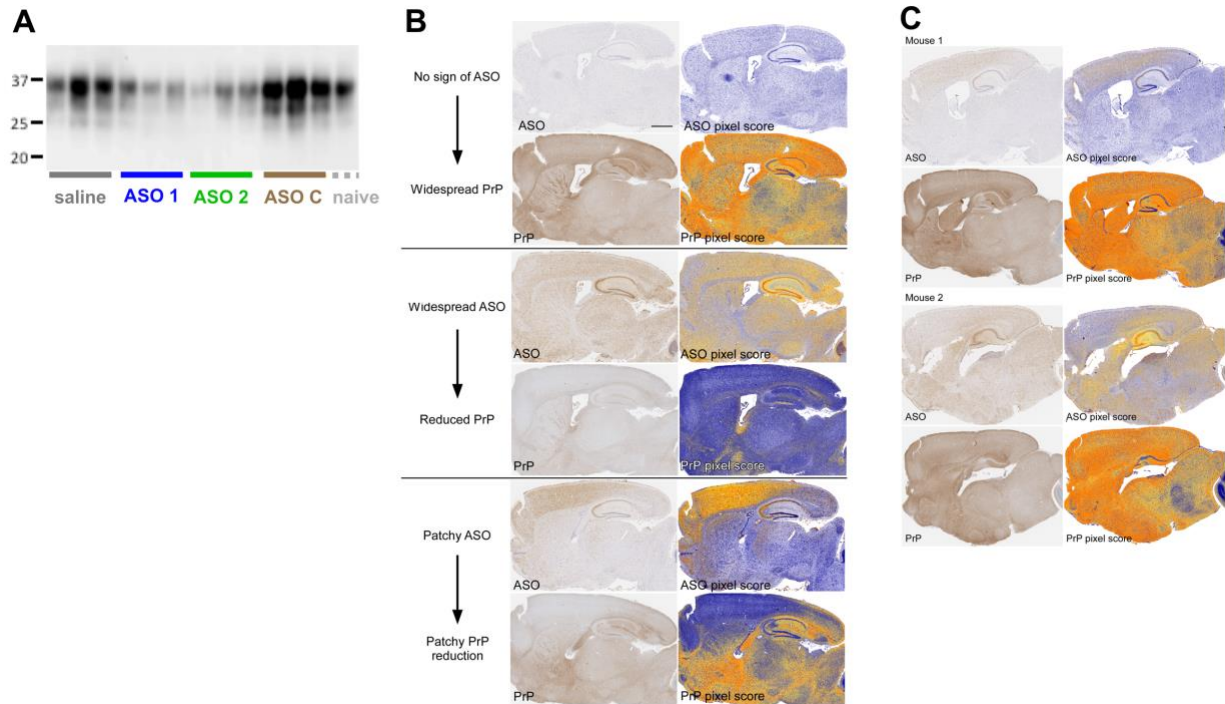

**Figure S2. Additional data regarding potency of PrP-lowering ASOs.** A) Mice received two 300 $\mu$ g ICV ASO doses at 60-day intervals and PrP in contralateral hemispheres was quantified 60 days after the second dose. Primary antibody used for PrP detection was 6D11. The migration of molecular mass standards in kilodaltons is shown on the right of the blot. B) Inverse distributions of anti-PrP ASOs and PrP 18 days after intracerebral injection of 500  $\mu$ g of the ASO. Immunohistochemical (IHC) staining for ASO and PrP as designated on midline sagittal sections of mouse brains (left column) with false color heat maps based on pixel scoring (blue = low, orange = high). Due to inconsistent drug delivery with freehand dosing, different outcomes were observed across different animals, and three scenarios are shown here: low ASO 1 retention in brain with strong PrP staining (top); widespread ASO 1 with low PrP (center); patchy ASO 2 distribution with inverse PrP distribution (bottom). Representative images chosen from a total of 9 animals (6 active ASO 1 and 3 active ASO 2) analyzed. C) Equivalent to Figure S2B but for control ASO. Here, no inverse relationship between ASO and PrP distribution is observed. Representative images chosen from a total of 3 animals analyzed.

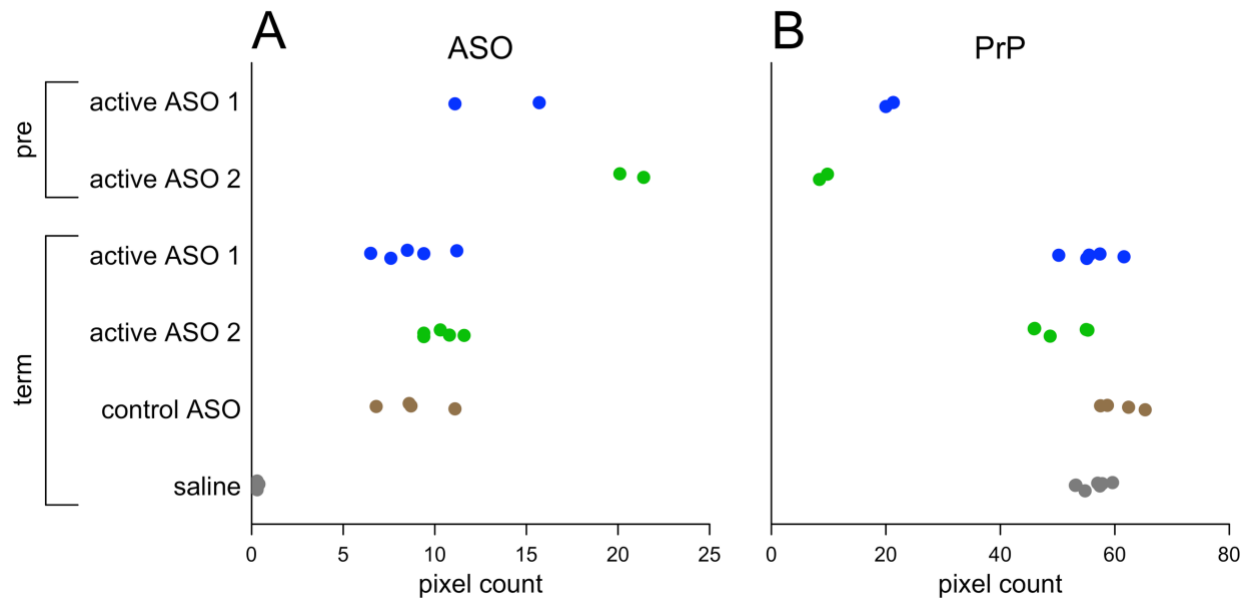

**Figure S3. Quantification of PrP and ASO immunohistochemical staining in additional prophylactically treated animals.** Pixel counts of ASO (left) and PrP (right) staining in whole sagittal slices of brain from mice treated as designated at their terminal clinical endpoint (term) or, in 2 cases each of ASO 1- and 2-treated mice, in the preclinical (pre) phase when collected within several dpi of the terminal endpoint for the control mice. Data points represent individual mice (biological replicates).

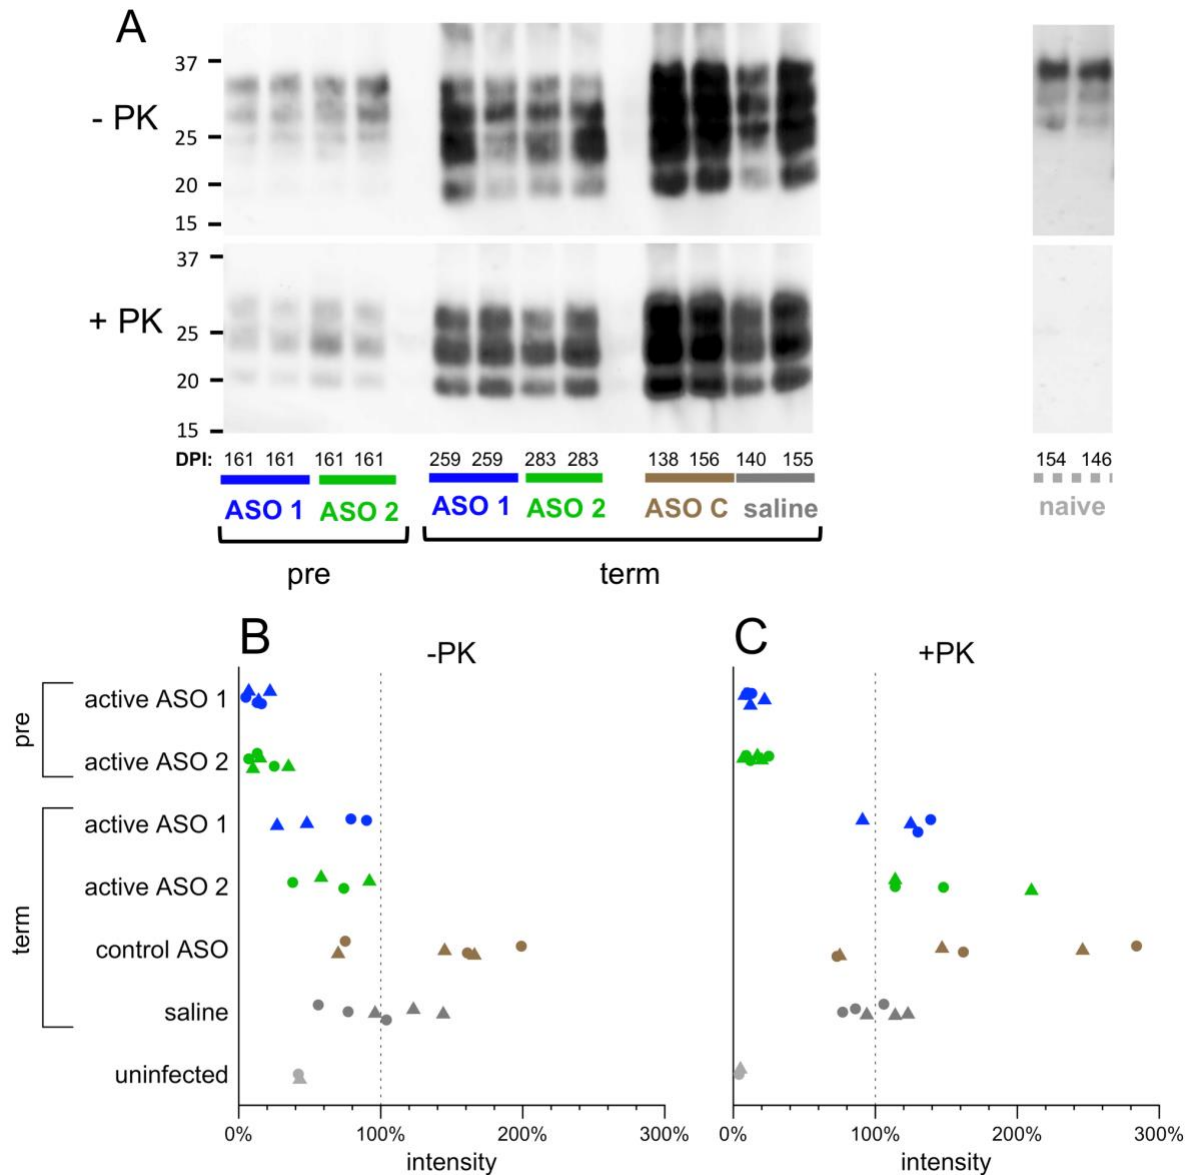

**Figure S4. Immunoblotting analysis of total (-PK) or PK-resistant PrP (+PK) in brain tissue from prion-infected mice given ASO or control treatments prophylactically.** **A)** Western blots. The ASO saline treatments, the days post scrapie infection (DPI) that the animals were euthanized, and clinical status of the mice at death are designated as “pre” for preclinical, and “term” for the terminal clinical endpoint. “Naïve” (uninfected) mice were neither treated with ASOs nor inoculated with prions, and were run on separate blots shown at far right. The migration of molecular mass standards in kilodaltons is shown on the left of each blot. **B-C)** Pixel count-based quantification of Western blots without (B) and with (C) proteinase K (PK) digestion, normalized to the mean value for saline-treated animals as 100%. Within each row, differently shaped symbols represent different mice, and the multiple data points for each mouse represent technical replicates from different Western blots.

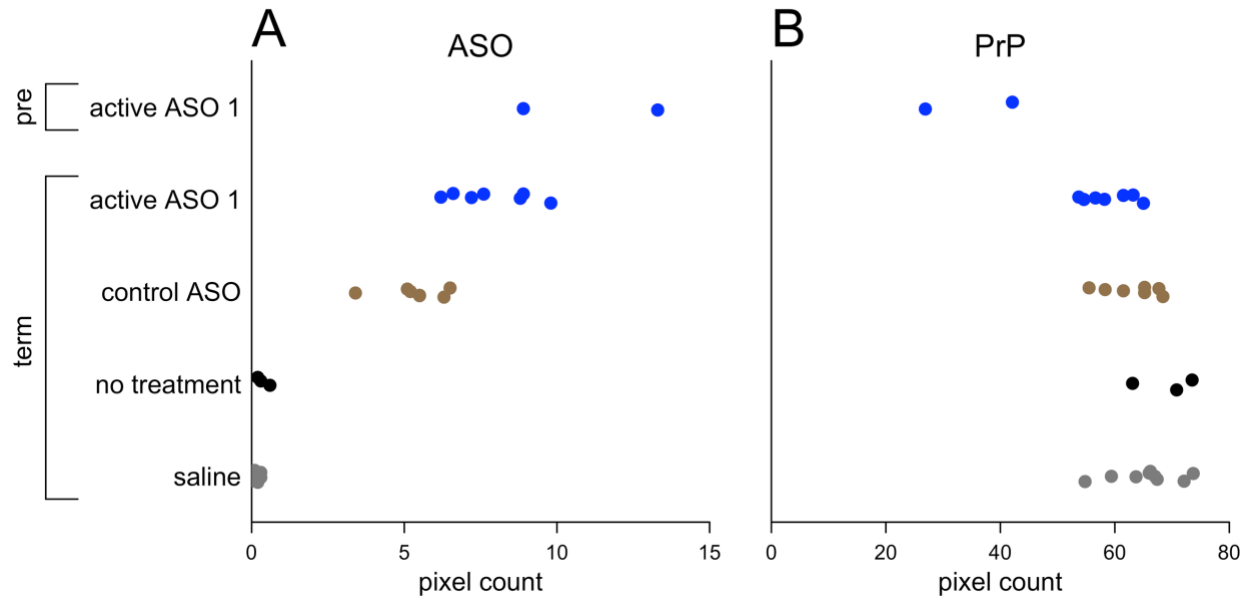

**Figure S5. Quantification of PrP and ASO immunohistochemical staining in additional 120 dpi-treated animals.** Pixel counts of ASO (left) and PrP (right) staining in whole sagittal slices of brain from mice treated designated at their terminal clinical endpoint (term) or, for two ASO 1 mouse, in the preclinical (pre) phase when collected within several dpi of the terminal endpoint of the control mice. Data points represent individual mice (biological replicates).

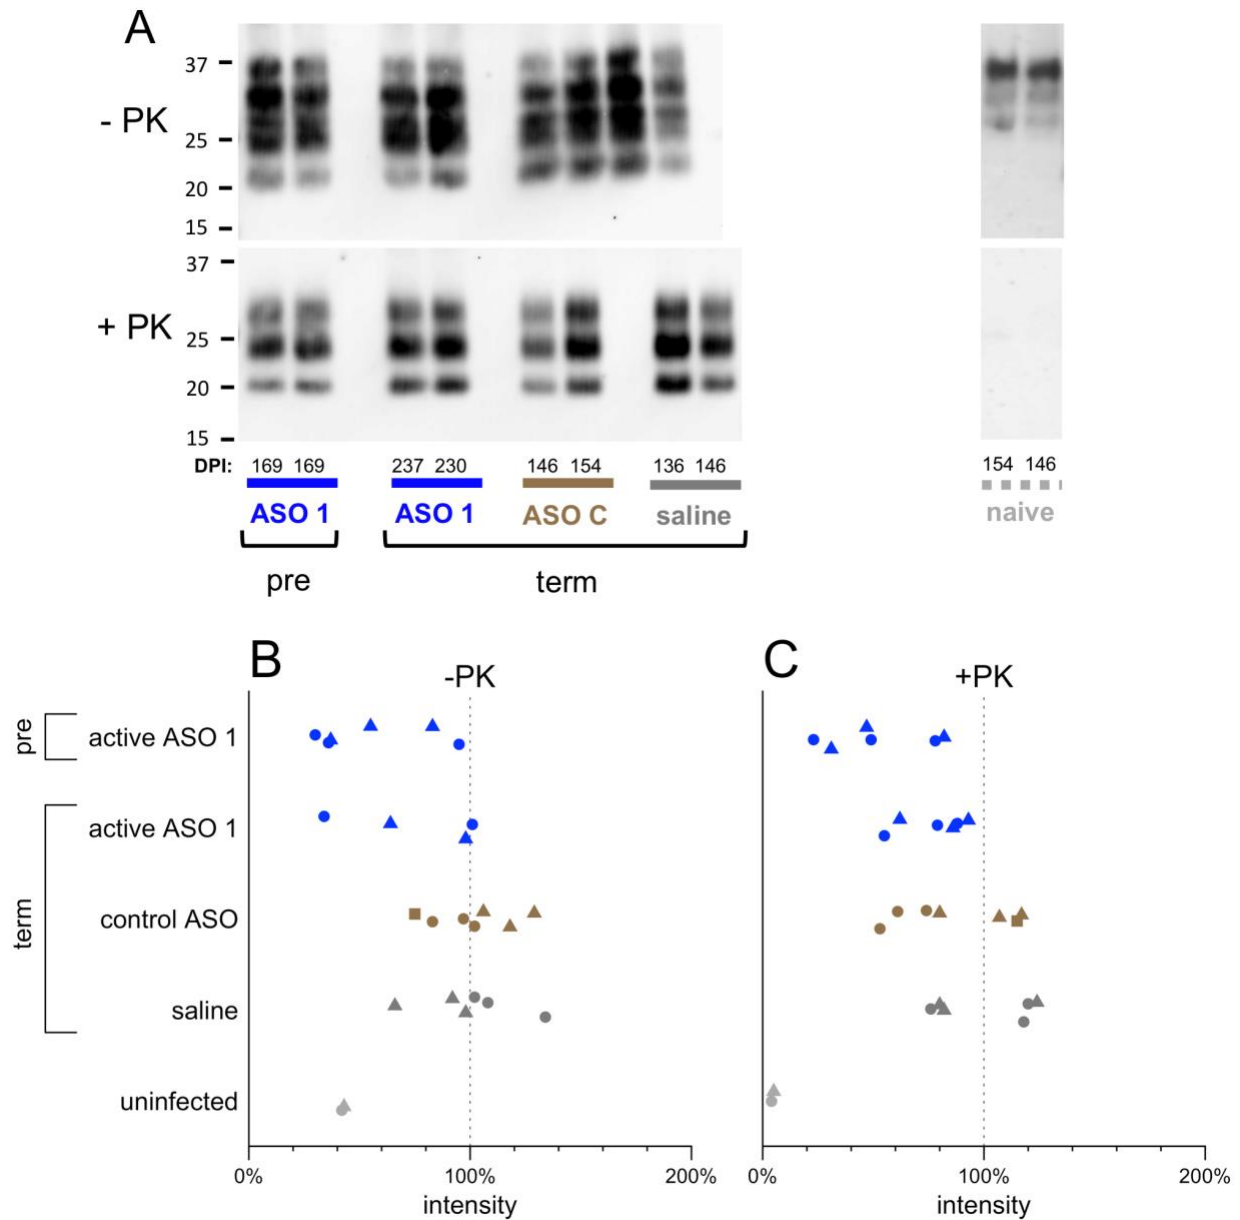

**Figure S6. Immunoblotting analysis of total (-PK) or PK-resistant PrP (+PK) in brain tissue from prion-infected mice given ASO or control treatments at 120 dpi.** **A)** Western blots. The ASO or saline treatments, the days post scrapie infection (DPI) that the animals were euthanized, and clinical status of the mice at death are designated as “pre” for preclinical, and “term” for the terminal clinical endpoint. The same two Naïve uninfected mice from Figure S4 are reproduced here for comparison, with separate blots again shown at far right. The migration of molecular mass standards in kilodaltons is shown on the left of each blot. **B-C)** Pixel count-based quantification of Western blots without (B) and with (C) proteinase K (PK) digestion, normalized to the mean value for saline-treated animals as 100%. Within each row, differently shaped symbols represent different mice, and the multiple data points for each mouse represent technical replicates from different Western blots.

## Supplementary Tables

**Table S1. Primers and probes used for RT-PCR.** Cyclophilin was used for normalization (see Methods).

| gene               | primer  | sequence                                    |
|--------------------|---------|---------------------------------------------|
| <b>Prnp</b>        | Forward | TCAGTCATCATGGCGAACCTT                       |
|                    | Reverse | AGGCCGACATCAGTCCACAT                        |
|                    | Probe   | CTACTGGCTGCTGGCCCTCTTTGTGACX                |
| <b>cyclophilin</b> | Forward | TCGCCGCTTGCTGCA                             |
|                    | Reverse | ATCGGCCGTGATGTGCA                           |
|                    | Probe   | CCATGGTCAACCCCACCGTGTTCTX                   |
| <b>Aif1 (Iba1)</b> | Forward | TGGTCCCCCAGCCAAGA                           |
|                    | Reverse | CCCACCGTGTGACATCCA                          |
|                    | Probe   | 5'-Fam-AGCTATCTCCGAGCTGCCCTGATTGGX-Tamra-3' |
| <b>Cd68</b>        | Forward | TGGCGGTGGAATACAATGTG                        |
|                    | Reverse | GATGAATTCTGCGCCATGAA                        |
|                    | Probe   | CCTCCCACAGGCAGCACAGTGGX                     |

**Table S2. Details on all mice.** The all-cause mortality column indicates whether the animal is counted as a death (1) or censored (0) for the all-cause mortality curves shown in figures 2C, 2E, and 3C. \*One animal died without developing clinical signs of prion disease, but was positive for prion pathology by immunohistochemistry.

| experiment       | treatment    | dpi | cause of death | all-cause mortality |
|------------------|--------------|-----|----------------|---------------------|
| NIH prophylactic | no treatment | 92  | intercurrent   | 1                   |
| NIH prophylactic | no treatment | 136 | prion disease  | 1                   |
| NIH prophylactic | no treatment | 139 | prion disease  | 1                   |
| NIH prophylactic | no treatment | 140 | prion disease  | 1                   |
| NIH prophylactic | no treatment | 146 | prion disease  | 1                   |
| NIH prophylactic | no treatment | 146 | prion disease  | 1                   |
| NIH prophylactic | no treatment | 152 | prion disease  | 1                   |
| NIH prophylactic | no treatment | 157 | prion disease  | 1                   |
| NIH prophylactic | saline       | 97  | intercurrent   | 1                   |
| NIH prophylactic | saline       | 118 | intercurrent   | 1                   |
| NIH prophylactic | saline       | 140 | prion disease  | 1                   |
| NIH prophylactic | saline       | 140 | prion disease  | 1                   |
| NIH prophylactic | saline       | 143 | prion disease  | 1                   |
| NIH prophylactic | saline       | 155 | prion disease  | 1                   |
| NIH prophylactic | saline       | 155 | prion disease  | 1                   |
| NIH prophylactic | saline       | 156 | prion disease  | 1                   |
| NIH prophylactic | saline       | 156 | prion disease  | 1                   |
| NIH prophylactic | control ASO  | 70  | intercurrent   | 1                   |
| NIH prophylactic | control ASO  | 120 | sudden         | 1                   |

| experiment       | treatment    | dpi | cause of death           | all-cause mortality |
|------------------|--------------|-----|--------------------------|---------------------|
| NIH prophylactic | control ASO  | 120 | sudden                   | 1                   |
| NIH prophylactic | control ASO  | 120 | sudden                   | 1                   |
| NIH prophylactic | control ASO  | 121 | sudden                   | 1                   |
| NIH prophylactic | control ASO  | 138 | prion disease            | 1                   |
| NIH prophylactic | control ASO  | 149 | prion disease            | 1                   |
| NIH prophylactic | control ASO  | 156 | prion disease            | 1                   |
| NIH prophylactic | control ASO  | 156 | prion disease            | 1                   |
| NIH prophylactic | active ASO 1 | 144 | intercurrent             | 1                   |
| NIH prophylactic | active ASO 1 | 161 | sacrificed for histology | 0                   |
| NIH prophylactic | active ASO 1 | 161 | sacrificed for histology | 0                   |
| NIH prophylactic | active ASO 1 | 227 | unknown*                 | 1                   |
| NIH prophylactic | active ASO 1 | 259 | prion disease            | 1                   |
| NIH prophylactic | active ASO 1 | 259 | prion disease            | 1                   |
| NIH prophylactic | active ASO 1 | 267 | prion disease            | 1                   |
| NIH prophylactic | active ASO 1 | 267 | prion disease            | 1                   |
| NIH prophylactic | active ASO 1 | 528 | never developed disease  | 0                   |
| NIH prophylactic | active ASO 2 | 113 | intercurrent             | 1                   |
| NIH prophylactic | active ASO 2 | 161 | sacrificed for histology | 0                   |
| NIH prophylactic | active ASO 2 | 161 | sacrificed for histology | 0                   |
| NIH prophylactic | active ASO 2 | 241 | intercurrent             | 1                   |
| NIH prophylactic | active ASO 2 | 283 | prion disease            | 1                   |
| NIH prophylactic | active ASO 2 | 283 | prion disease            | 1                   |
| NIH prophylactic | active ASO 2 | 283 | prion disease            | 1                   |
| NIH prophylactic | active ASO 2 | 286 | prion disease            | 1                   |
| NIH prophylactic | active ASO 2 | 290 | prion disease            | 1                   |
| NIH 120 dpi      | saline       | 136 | prion disease            | 1                   |
| NIH 120 dpi      | saline       | 146 | prion disease            | 1                   |
| NIH 120 dpi      | saline       | 152 | prion disease            | 1                   |
| NIH 120 dpi      | saline       | 154 | prion disease            | 1                   |
| NIH 120 dpi      | saline       | 157 | prion disease            | 1                   |
| NIH 120 dpi      | saline       | 157 | prion disease            | 1                   |
| NIH 120 dpi      | saline       | 157 | prion disease            | 1                   |
| NIH 120 dpi      | saline       | 163 | prion disease            | 1                   |
| NIH 120 dpi      | saline       | 163 | prion disease            | 1                   |
| NIH 120 dpi      | control ASO  | 128 | sudden                   | 1                   |
| NIH 120 dpi      | control ASO  | 129 | sudden                   | 1                   |
| NIH 120 dpi      | control ASO  | 146 | prion disease            | 1                   |
| NIH 120 dpi      | control ASO  | 152 | prion disease            | 1                   |
| NIH 120 dpi      | control ASO  | 154 | prion disease            | 1                   |



| <b>experiment</b>  | <b>treatment</b> | <b>dpi</b> | <b>cause of death</b>    | <b>all-cause mortality</b> |
|--------------------|------------------|------------|--------------------------|----------------------------|
| NIH 120 dpi        | control ASO      | 154        | prion disease            | 1                          |
| NIH 120 dpi        | control ASO      | 154        | prion disease            | 1                          |
| NIH 120 dpi        | control ASO      | 154        | prion disease            | 1                          |
| NIH 120 dpi        | control ASO      | 163        | prion disease            | 1                          |
| NIH 120 dpi        | active ASO 1     | 169        | sacrificed for histology | 0                          |
| NIH 120 dpi        | active ASO 1     | 169        | sacrificed for histology | 0                          |
| NIH 120 dpi        | active ASO 1     | 230        | prion disease            | 1                          |
| NIH 120 dpi        | active ASO 1     | 237        | prion disease            | 1                          |
| NIH 120 dpi        | active ASO 1     | 244        | prion disease            | 1                          |
| NIH 120 dpi        | active ASO 1     | 244        | prion disease            | 1                          |
| NIH 120 dpi        | active ASO 1     | 248        | prion disease            | 1                          |
| NIH 120 dpi        | active ASO 1     | 248        | prion disease            | 1                          |
| NIH 120 dpi        | active ASO 1     | 257        | prion disease            | 1                          |
| NIH 120 dpi        | active ASO 2     | 129        | sudden                   | 1                          |
| NIH 120 dpi        | active ASO 2     | 129        | sudden                   | 1                          |
| NIH 120 dpi        | active ASO 2     | 129        | sudden                   | 1                          |
| NIH 120 dpi        | active ASO 2     | 129        | sudden                   | 1                          |
| NIH 120 dpi        | active ASO 2     | 130        | sudden                   | 1                          |
| NIH 120 dpi        | active ASO 2     | 130        | sudden                   | 1                          |
| NIH 120 dpi        | active ASO 2     | 130        | sudden                   | 1                          |
| NIH 120 dpi        | active ASO 2     | 130        | sudden                   | 1                          |
| NIH 120 dpi        | active ASO 2     | 130        | sudden                   | 1                          |
| Broad prophylactic | no treatment     | 1          | intercurrent             | 0                          |
| Broad prophylactic | no treatment     | 1          | intercurrent             | 0                          |
| Broad prophylactic | no treatment     | 139        | prion disease            | 1                          |
| Broad prophylactic | no treatment     | 141        | prion disease            | 1                          |
| Broad prophylactic | no treatment     | 155        | prion disease            | 1                          |
| Broad prophylactic | no treatment     | 155        | prion disease            | 1                          |
| Broad prophylactic | no treatment     | 157        | prion disease            | 1                          |
| Broad prophylactic | no treatment     | 157        | prion disease            | 1                          |
| Broad prophylactic | no treatment     | 157        | prion disease            | 1                          |
| Broad prophylactic | no treatment     | 159        | prion disease            | 1                          |
| Broad prophylactic | no treatment     | 160        | prion disease            | 1                          |
| Broad prophylactic | no treatment     | 167        | prion disease            | 1                          |
| Broad prophylactic | no treatment     | 169        | prion disease            | 1                          |
| Broad prophylactic | no treatment     | 170        | prion disease            | 1                          |
| Broad prophylactic | no treatment     | 171        | prion disease            | 1                          |
| Broad prophylactic | no treatment     | 172        | prion disease            | 1                          |
| Broad prophylactic | no treatment     | 172        | prion disease            | 1                          |

| experiment         | treatment    | dpi | cause of death          | all-cause mortality |
|--------------------|--------------|-----|-------------------------|---------------------|
| Broad prophylactic | no treatment | 183 | prion disease           | 1                   |
| Broad prophylactic | no treatment | 183 | prion disease           | 1                   |
| Broad prophylactic | no treatment | 206 | prion disease           | 1                   |
| Broad prophylactic | saline       | 157 | prion disease           | 1                   |
| Broad prophylactic | saline       | 168 | prion disease           | 1                   |
| Broad prophylactic | saline       | 168 | prion disease           | 1                   |
| Broad prophylactic | saline       | 169 | prion disease           | 1                   |
| Broad prophylactic | saline       | 169 | prion disease           | 1                   |
| Broad prophylactic | saline       | 170 | prion disease           | 1                   |
| Broad prophylactic | saline       | 170 | prion disease           | 1                   |
| Broad prophylactic | saline       | 170 | prion disease           | 1                   |
| Broad prophylactic | saline       | 171 | prion disease           | 1                   |
| Broad prophylactic | saline       | 171 | prion disease           | 1                   |
| Broad prophylactic | saline       | 172 | prion disease           | 1                   |
| Broad prophylactic | saline       | 172 | prion disease           | 1                   |
| Broad prophylactic | control ASO  | 6   | intercurrent            | 1                   |
| Broad prophylactic | control ASO  | 165 | prion disease           | 1                   |
| Broad prophylactic | control ASO  | 165 | prion disease           | 1                   |
| Broad prophylactic | control ASO  | 165 | prion disease           | 1                   |
| Broad prophylactic | control ASO  | 167 | prion disease           | 1                   |
| Broad prophylactic | control ASO  | 170 | prion disease           | 1                   |
| Broad prophylactic | control ASO  | 170 | prion disease           | 1                   |
| Broad prophylactic | control ASO  | 172 | prion disease           | 1                   |
| Broad prophylactic | control ASO  | 172 | prion disease           | 1                   |
| Broad prophylactic | control ASO  | 178 | prion disease           | 1                   |
| Broad prophylactic | control ASO  | 190 | prion disease           | 1                   |
| Broad prophylactic | control ASO  | 315 | never developed disease | 0                   |
| Broad prophylactic | active ASO 1 | 0   | intercurrent            | 0                   |
| Broad prophylactic | active ASO 1 | 252 | prion disease           | 1                   |
| Broad prophylactic | active ASO 1 | 263 | prion disease           | 1                   |
| Broad prophylactic | active ASO 1 | 264 | prion disease           | 1                   |
| Broad prophylactic | active ASO 1 | 270 | prion disease           | 1                   |
| Broad prophylactic | active ASO 1 | 270 | prion disease           | 1                   |
| Broad prophylactic | active ASO 1 | 277 | prion disease           | 1                   |
| Broad prophylactic | active ASO 1 | 277 | prion disease           | 1                   |
| Broad prophylactic | active ASO 1 | 277 | prion disease           | 1                   |
| Broad prophylactic | active ASO 1 | 277 | prion disease           | 1                   |
| Broad prophylactic | active ASO 1 | 281 | prion disease           | 1                   |
| Broad prophylactic | active ASO 1 | 287 | prion disease           | 1                   |

| <b>experiment</b>  | <b>treatment</b> | <b>dpi</b> | <b>cause of death</b> | <b>all-cause mortality</b> |
|--------------------|------------------|------------|-----------------------|----------------------------|
| Broad prophylactic | active ASO 2     | 1          | intercurrent          | 0                          |
| Broad prophylactic | active ASO 2     | 287        | prion disease         | 1                          |
| Broad prophylactic | active ASO 2     | 294        | prion disease         | 1                          |
| Broad prophylactic | active ASO 2     | 295        | prion disease         | 1                          |
| Broad prophylactic | active ASO 2     | 299        | prion disease         | 1                          |
| Broad prophylactic | active ASO 2     | 299        | prion disease         | 1                          |
| Broad prophylactic | active ASO 2     | 301        | prion disease         | 1                          |
| Broad prophylactic | active ASO 2     | 301        | prion disease         | 1                          |
| Broad prophylactic | active ASO 2     | 301        | prion disease         | 1                          |
| Broad prophylactic | active ASO 2     | 301        | prion disease         | 1                          |
| Broad prophylactic | active ASO 2     | 303        | prion disease         | 1                          |
| Broad prophylactic | active ASO 2     | 306        | prion disease         | 1                          |
